# Supplementary material
Source: Frontiers journal article supplement (https://www.frontiersin.org/articles/517786)

## Supplementary information

Table S1. The related proteins involved in carbon metabolism and oxidative stress metabolic pathway.

Table S2. The related genes involved in cell growth and AOX1 promoter regulation.

Table S3. The related genes involved in UPR and ERAD pathways.

Table S4. The related genes involved in the autophagy pathway.

### Figure legend

Figure S1. Biomass and phytase enzyme activity with/without GM phase in the 100-L fermentation.

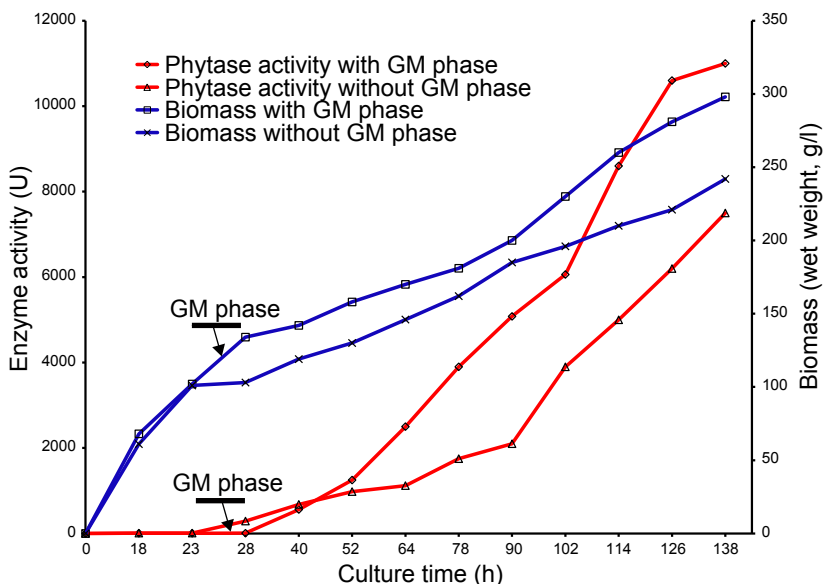

Supplement: Data_Sheet_1.PDF [file Data_Sheet_1.PDF]
